# Supplementary material for: The importance of the Sustainable Development Goals to students of environmental and sustainability studies—a global survey in 41 countries
Source: Springer Nature journal article supplement (doi:10.1057/s41599-022-01242-0), 2022-06-29

Supplementary Table 1: Results of the comparison of the three factors within the different countries. The first value indicates the significance of the Friedman test. For significant p-values on the Friedman test, a pairwise comparison (Dunn test with Bonferroni correction) was performed. The effective size was calculated with the formula r = .

| Country | Friedman test | Factor 1 – Factor 2 | | Factor 2 – Factor 3 | | Factor 1 – Factor 3 | |
| --- | --- | --- | --- | --- | --- | --- | --- |
| Commonwealth of Australia | p < 0.001 | p < 0.001 | r = 0.362 | p < 0.001 | r = 0.607 | p = 0.002 | r = 0.245 |
| Republic of Benin | p = 0.001 | p = 1.000 |  | p = 0.034 | r = 0.400 | p = 0.043 | r = 0.388 |
| Federative Republic of Brazil | p < 0.001 | p = 0.013 | r = 0.216 | p = 0.011 | r = 0.219 | p = 1.000 |  |
| Canada | p < 0.001 | p < 0.001 | r = 0.307 | p < 0.001 | r = 0.499 | p = 0.001 | r = 0.192 |
| People's Republic of China | p < 0.001 | p = 0.065 |  | p < 0.001 | r = 0.276 | p = 0.368 |  |
| Republic of Colombia | p < 0.001 | p = 0.290 |  | p < 0.001 | r = 0.280 | p = 0.065 |  |
| Republic of the Congo | p = 0.009 | p = 0.662 |  | p = 0.199 |  | p = 1.000 |  |
| Republic of Costa Rica | p = 0.015 | p = 1.000 |  | p = 0.058 |  | p = 0.285 |  |
| Dominican Republic | p < 0.001 | p = 1.000 |  | p = 0.027 | r = 0.186 | p = 0.001 | r = 0.250 |
| Republic of Ecuador | p < 0.001 | p = 0.403 |  | p = 0.016 | r = 0.380 | p = 0.588 |  |
| French Republic | p < 0.001 | p < 0.001 | r = 0.445 | p < 0.001 | r = 0.680 | p = 0.002 | r = 0.236 |
| Federal Republic of Germany | p < 0.001 | p = 1.000 |  | p < 0.001 | r = 0.402 | p = 0.001 | r = 0.476 |
| Republic of India | p < 0.001 | p = 0.001 | r = 0.355 | p < 0.001 | r = 0.425 | p = 1.000 |  |
| Republic of Ireland | p < 0.001 | p < 0.001 | r = 0.390 | p < 0.001 | r = 0.508 | p = 0.830 |  |
| Japan | p < 0.001 | p = 0.004 | r = 0.311 | p = 0.040 | r = 0.241 | p = 1.000 |  |
| Republic of Kenya | p = 0.019 | p = 1.000 |  | p = 0.737 |  | p = 1.000 |  |
| United Mexican States | p < 0.001 | p = 0.186 |  | p < 0.001 | r = 0.396 | p < 0.001 | r = 0.287 |
| Kingdom of Morocco | p = 0.056 |  |  |  |  |  |  |
| Republic of Namibia | p = 0.419 |  |  |  |  |  |  |
| Federal Republic of Nigeria | p = 0.030 | p = 0.551 |  | p = 0.441 |  | p = 1.000 |  |
| Islamic Republic of Pakistan | p = 0.003 | p = 0.438 |  | p = 0.057 |  | p = 1.000 |  |
| Republic of Panama | p < 0.001 | p = 1.000 |  | p = 0.52 |  | p = 0.52 |  |
| Republic of Peru | p = 0.007 | p = 0.191 |  | p = 0.092 |  | p = 1.000 |  |
| Republic of the Philippines | p < 0.001 | p = 0.006 | r = 0.141 | p < 0.001 | r = 0.194 | p = 0.712 |  |
| Republic of Poland | p < 0.001 | p < 0.001 | r = 0.474 | p < 0.001 | r = 0.516 | p = 0.652 |  |
| Portuguese Republic | p < 0.001 | p < 0.001 | r = 0.438 | p < 0.001 | r = 0.469 | p = 1.000 |  |
| Commonwealth of Puerto Rico | p < 0.001 | p = 0.064 |  | p = 0.049 | r = 0.236 | p = 1.000 |  |
| Russian Federation | p < 0.001 | p = 0.008 | r = 0.225 | p < 0.001 | r = 0.407 | p = 0.045 | r = 0.183 |
| Kingdom of Saudi Arabia | p = 0.069 |  |  |  |  |  |  |
| Republic of Singapore | p < 0.001 | p < 0.001 | r = 0.275 | p < 0.001 | r = 0.350 | p = 0.736 |  |
| Slovak Republic | p < 0.001 | p < 0.001 | r = 0.317 | p < 0.001 | r = 0.353 | p = 1.000 |  |
| Republic of South Africa | p = 0.002 | p = 0.436 |  | p = 0.011 | r = 0.404 | p = 0.436 |  |
| Republic of Korea | p = 0.008 | p = 1.000 |  | p = 0.026 | r = 0.271 | p = 0.133 |  |
| Kingdom of Spain | p < 0.001 | p < 0.001 | r = 0.192 | p < 0.001 | r = 0.343 | p = 0.001 | r = 0.151 |
| Kingdom of Sweden | p < 0.001 | p < 0.001 | r = 0.517 | p < 0.001 | r = 0.616 | p = 1.000 |  |
| Republic of China | p < 0.001 | p = 1.000 |  | p < 0.001 | r = 0.234 | p < 0.001 | r = 0.240 |
| Kingdom of Thailand | p = 0.030 | p = 1.000 |  | p = 0.290 |  | p = 1.000 |  |
| Republic of Uganda | p = 0.549 |  |  |  |  |  |  |
| United Arab Emirates | p = 0.024 | p = 1.000 |  | p = 0.197 |  | p = 0.694 |  |
| United Kingdom of Great Britain and Northern Ireland | p < 0.001 | p < 0.001 | r = 0.451 | p < 0.001 | r = 0.486 | p = 1.000 |  |
| United States of America | p < 0.001 | p < 0.001 | r = 0.320 | p < 0.001 | r = 0.337 | p = 1.000 |  |

Supplementary Table 2: Mean values of the three higher-order factors for each country with standard deviation. The values were rounded to 2 decimal places.

|  | n | Social ± SD | Economic ± SD | Environment ± SD |
| --- | --- | --- | --- | --- |
| AUS | 104 | 4.55 ± 0.56 | 4.32 ± 0.55 | 4.81 ± 0.34 |
| BEN | 23 | 4.63 ± 0.54 | 4.56 ± 0.61 | 4.90 ± 0.25 |
| BRA | 96 | 4.90 ± 0.29 | 4.77 ± 0.39 | 4.91 ± 0.28 |
| CAN | 190 | 4.57 ± 0.54 | 4.35 ± 0.55 | 4.76 ± 0.39 |
| CHN | 105 | 4.44 ± 0.65 | 4.29 ± 0.70 | 4.59 ± 0.64 |
| COL | 120 | 4.76 ± 0.47 | 4.70 ± 0.46 | 4.91 ± 0.27 |
| CGO | 16 | 4.89 ± 0.25 | 4.77 ± 0.31 | 5.00 ± 0.00 |
| CRC | 30 | 4.79 ± 0.25 | 4.70 ± 0.32 | 4.89 ± 0.18 |
| DOM | 112 | 4.70 ± 0.47 | 4.73 ± 0.44 | 4.89 ± 0.31 |
| ECU | 29 | 4.79 ± 0.34 | 4.73 ± 0.31 | 4.97 ± 0.08 |
| FRA | 115 | 4.47 ± 0.51 | 3.99 ± 0.58 | 4.73 ± 0.40 |
| GER | 108 | 4.09 ± 0.66 | 4.10 ± 0.74 | 4.46 ± 0.72 |
| IND | 57 | 4.84 ± 0.31 | 4.67 ± 0.36 | 4.89 ± 0.23 |
| IRL | 74 | 4.73 ± 0.41 | 4.40 ± 0.56 | 4.82 ± 0.34 |
| JPN | 59 | 4.35 ± 0.71 | 4.10 ± 0.68 | 4.25 ± 0.81 |
| KEN | 61 | 4.94 ± 0.17 | 4.90 ± 0.30 | 4.94 ± 0.29 |
| MEX | 159 | 4.61 ± 0.45 | 4.54 ± 0.45 | 4.81 ± 0.43 |
| MAR | 46 | 4.69 ± 0.50 | 4.68 ± 0.55 | 4.80 ± 0.46 |
| NAM | 19 | 4.94 ± 0.13 | 4.87 ± 0.20 | 4.92 ± 0.17 |
| NGR | 85 | 4.88 ± 0.27 | 4.79 ± 0.35 | 4.84 ± 0.37 |
| PAK | 101 | 4.79 ± 0.38 | 4.65 ± 0.54 | 4.81 ± 0.42 |
| PAN | 29 | 4.74 ± 0.31 | 4.79 ± 0.31 | 4.99 ± 0.05 |
| PER | 122 | 4.68 ± 0.52 | 4.64 ± 0.46 | 4.71 ± 0.58 |
| PHI | 265 | 4.91 ± 0.26 | 4.78 ± 0.39 | 4.92 ± 0.25 |
| POL | 503 | 4.44 ± 0.63 | 3.92 ± 0.67 | 4.52 ± 0.62 |
| POR | 209 | 4.71 ± 0.41 | 4.39 ± 0.58 | 4.75 ± 0.41 |
| PUR | 57 | 4.91 ± 0.19 | 4.71 ± 0.43 | 4.88 ± 0.21 |
| RUS | 104 | 4.43 ± 0.63 | 4.22 ± 0.69 | 4.55 ± 0.61 |
| KSA | 120 | 4.80 ± 0.43 | 4.67 ± 0.59 | 4.72 ± 0.70 |
| SGP | 127 | 4.41 ± 0.54 | 4.21 ± 0.55 | 4.50 ± 0.57 |
| SVK | 131 | 4.43 ± 0.67 | 4.17 ± 0.75 | 4.50 ± 0.68 |
| RSA | 30 | 4.73 ± 0.32 | 4.63 ± 0.45 | 4.86 ± 0.28 |
| KOR | 48 | 4.23 ± 0.53 | 4.29 ± 0.48 | 4.47 ± 0.51 |
| ESP | 295 | 4.62 ± 0.49 | 4.49 ± 0.51 | 4.76 ± 0.44 |
| SWE | 49 | 4.60 ± 0.53 | 4.06 ± 0.58 | 4.71 ± 0.45 |
| TPE | 184 | 4.42 ± 0.58 | 4.42 ± 0.60 | 4.58 ± 0.54 |
| THA | 66 | 4.72 ± 0.44 | 4.68 ± 0.52 | 4.77 ± 0.42 |
| UGA | 18 | 4.69 ± 0.46 | 4.54 ± 0.64 | 4.58 ± 0.79 |
| UAE | 60 | 4.79 ± 0.41 | 4.80 ± 0.42 | 4.88 ± 0.35 |
| GBR | 98 | 4.70 ± 0.36 | 4.31 ± 0.62 | 4.71 ± 0.74 |
| USA | 81 | 4.51 ± 0.73 | 4.28 ± 0.73 | 4.53 ± 0.75 |

Supplementary Figure 1: The questionnaire in English language used for the research. The survey was conducted in one of the official languages of each survey country. For this purpose, the questionnaire was translated by native speakers.


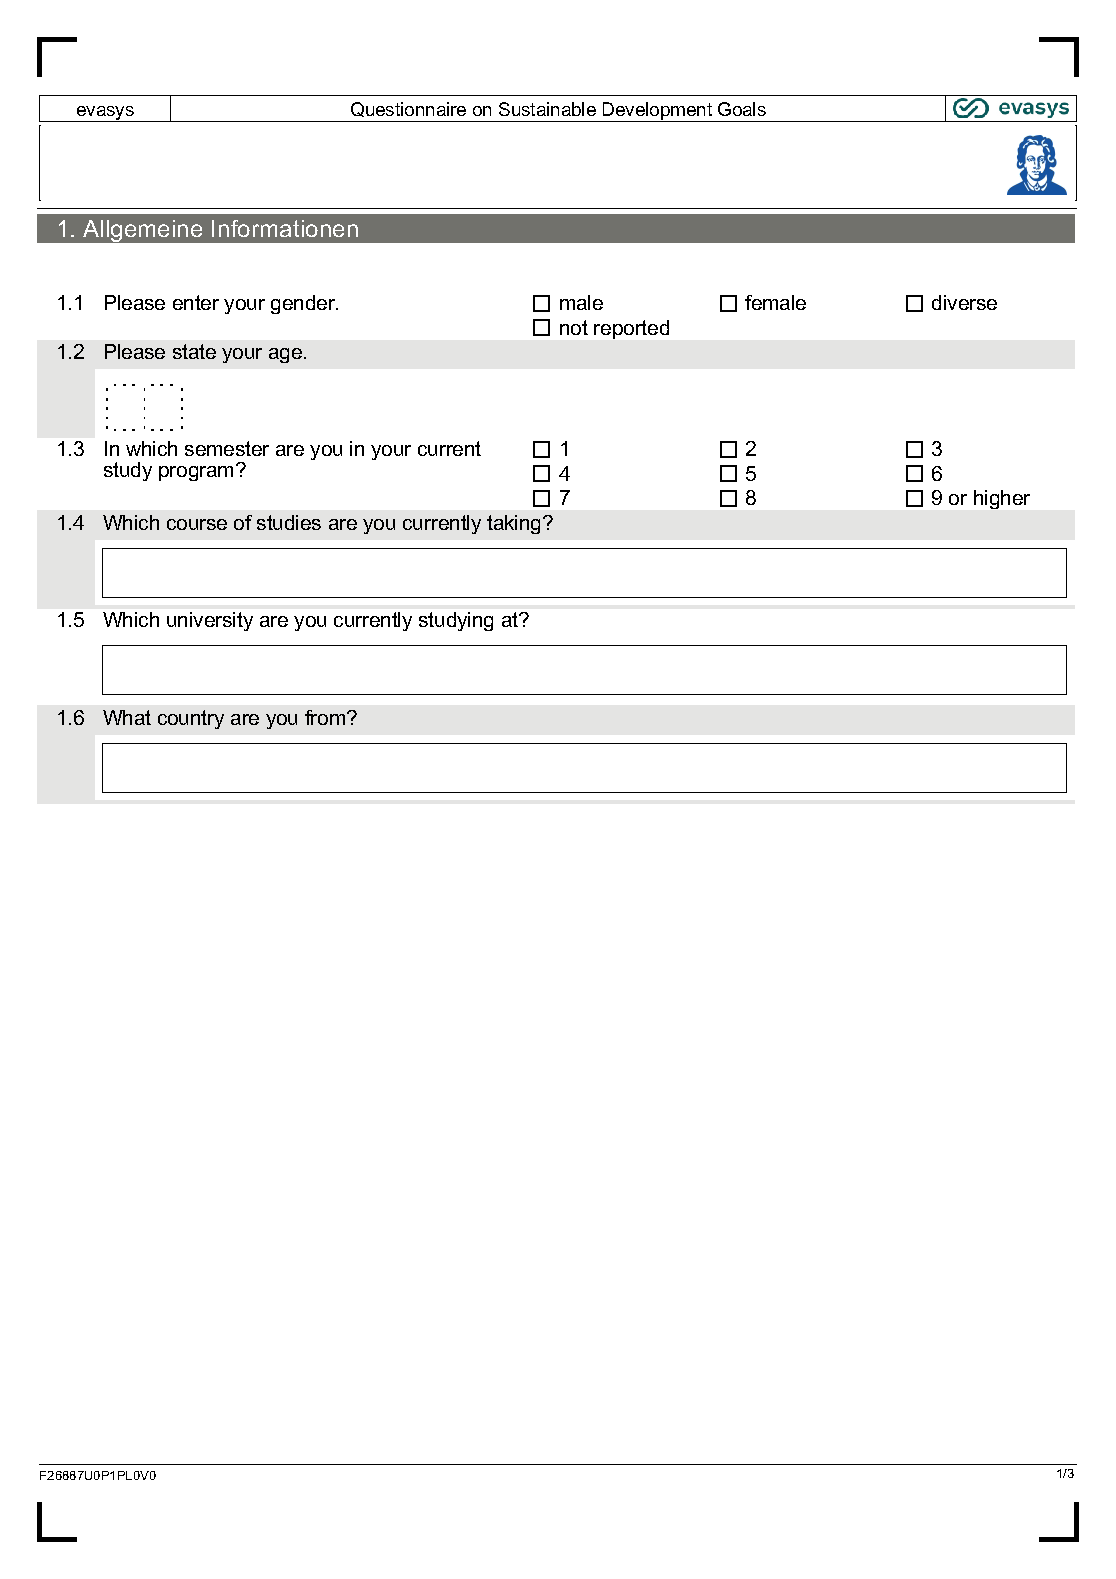


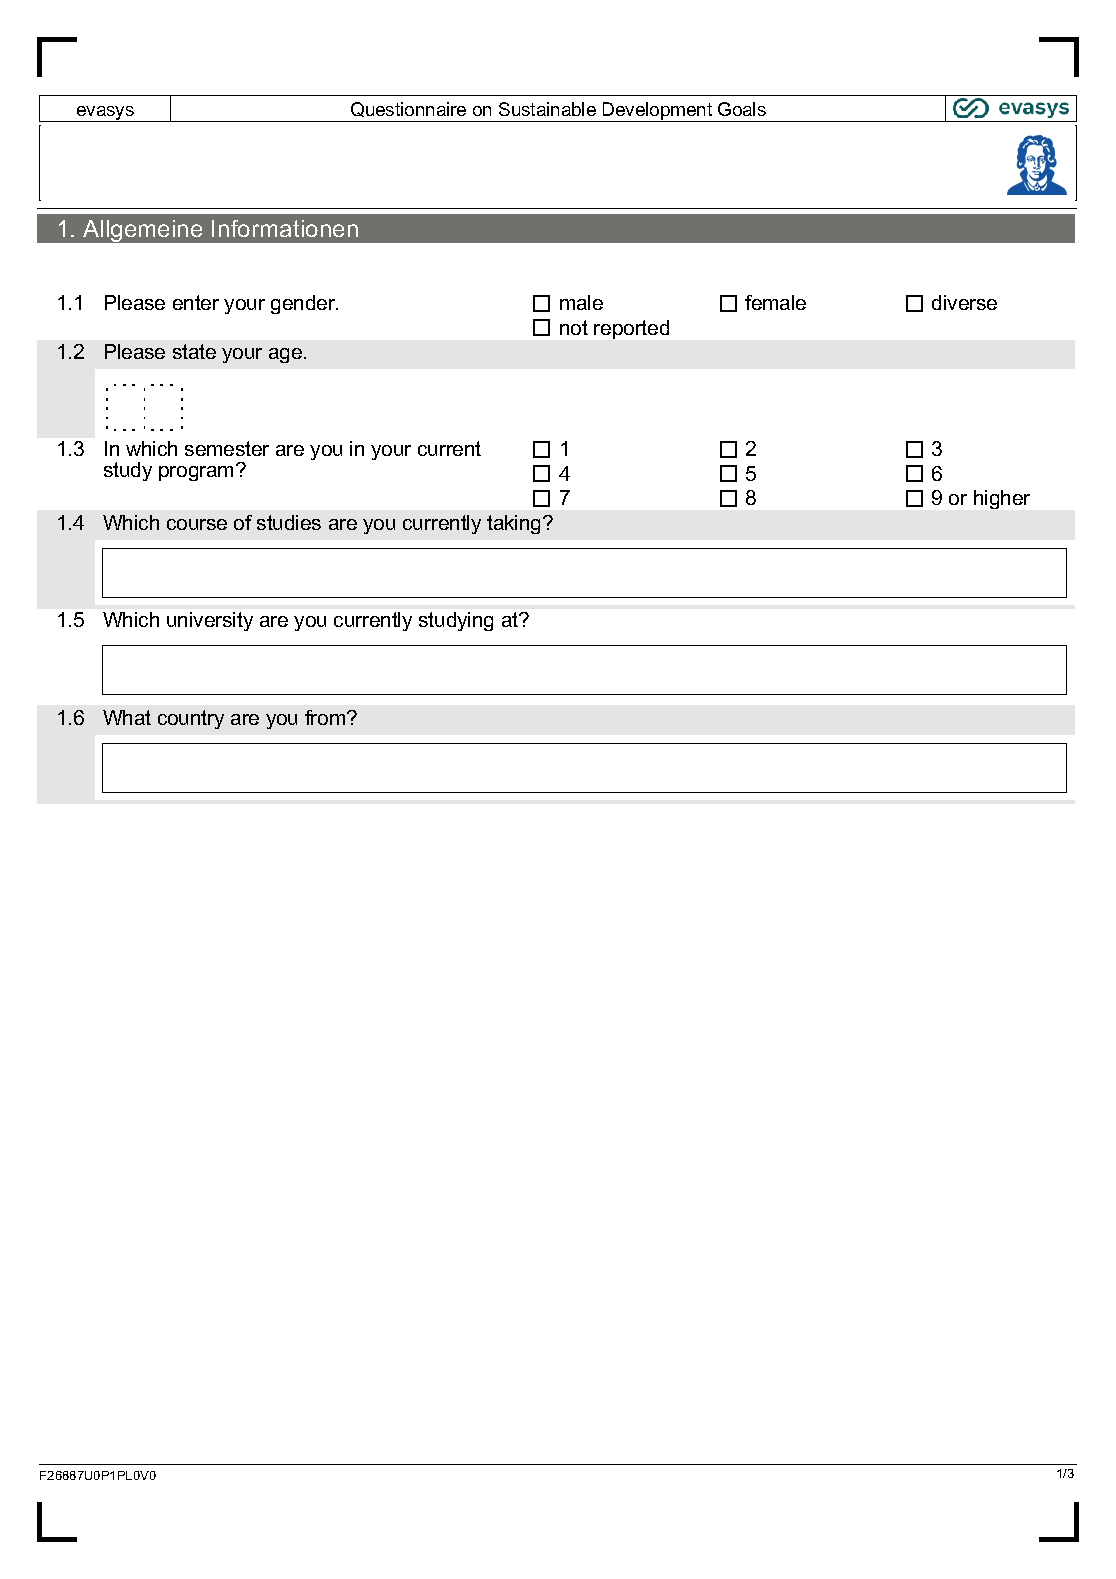

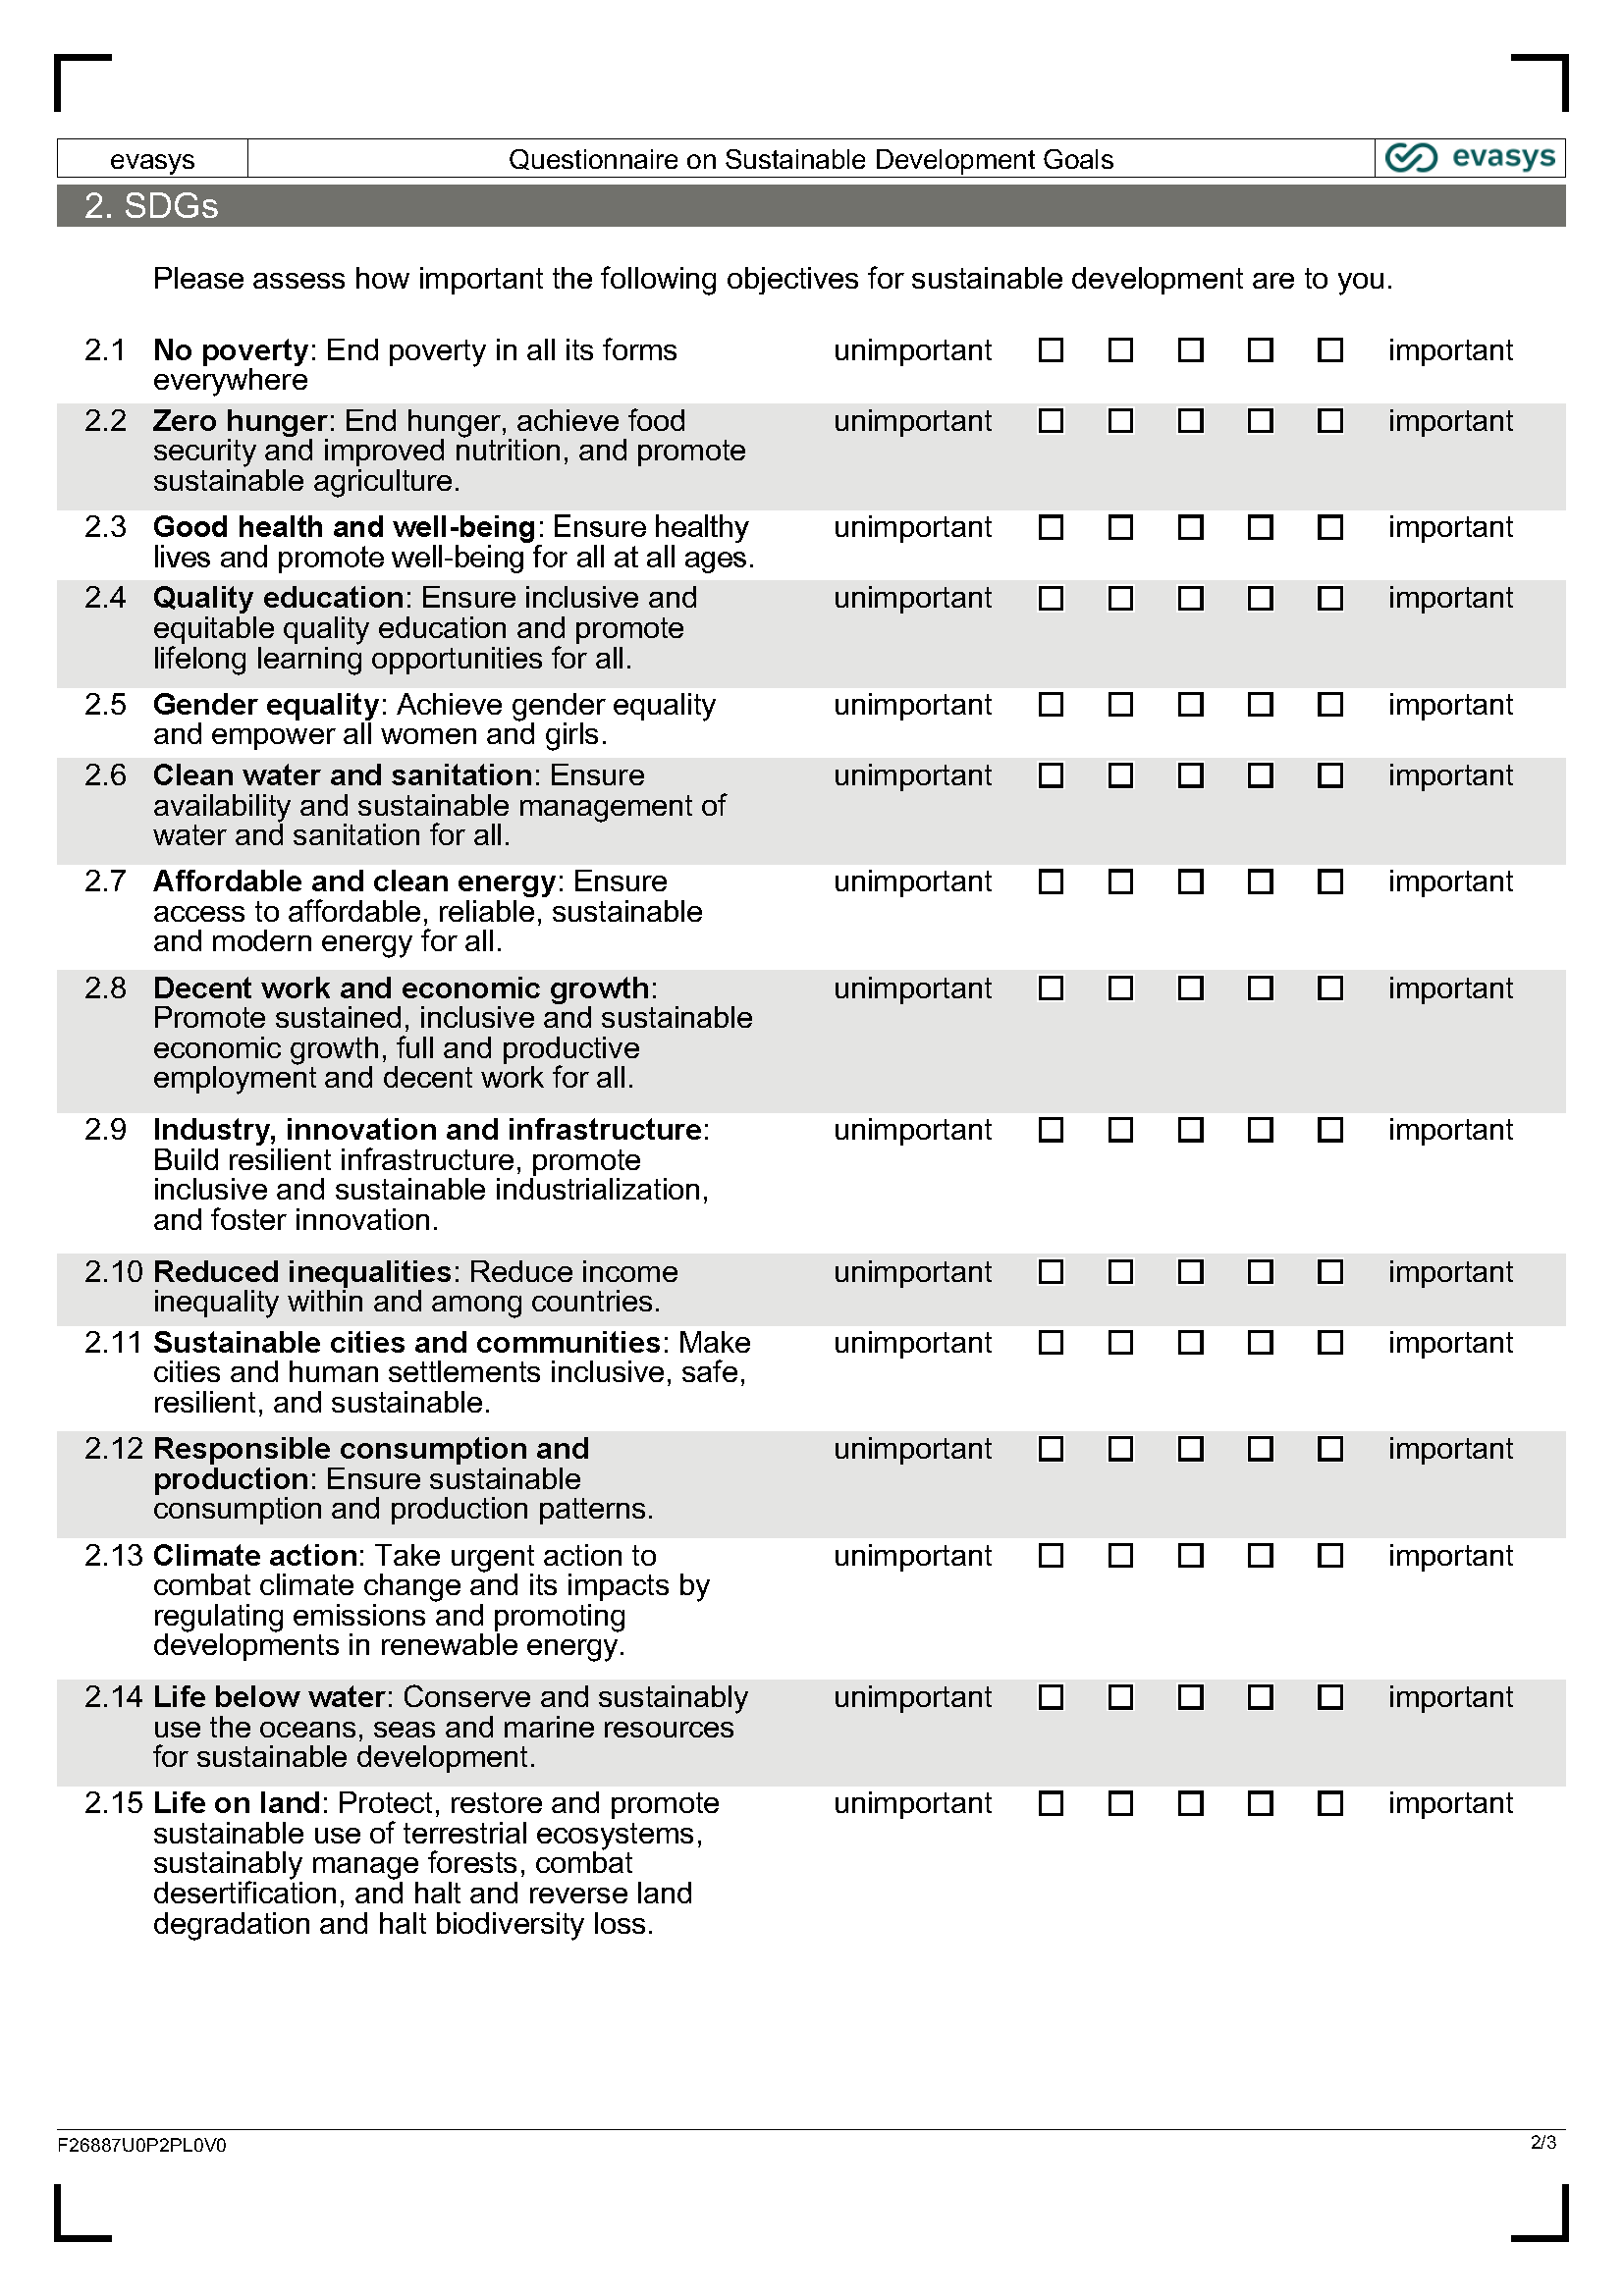

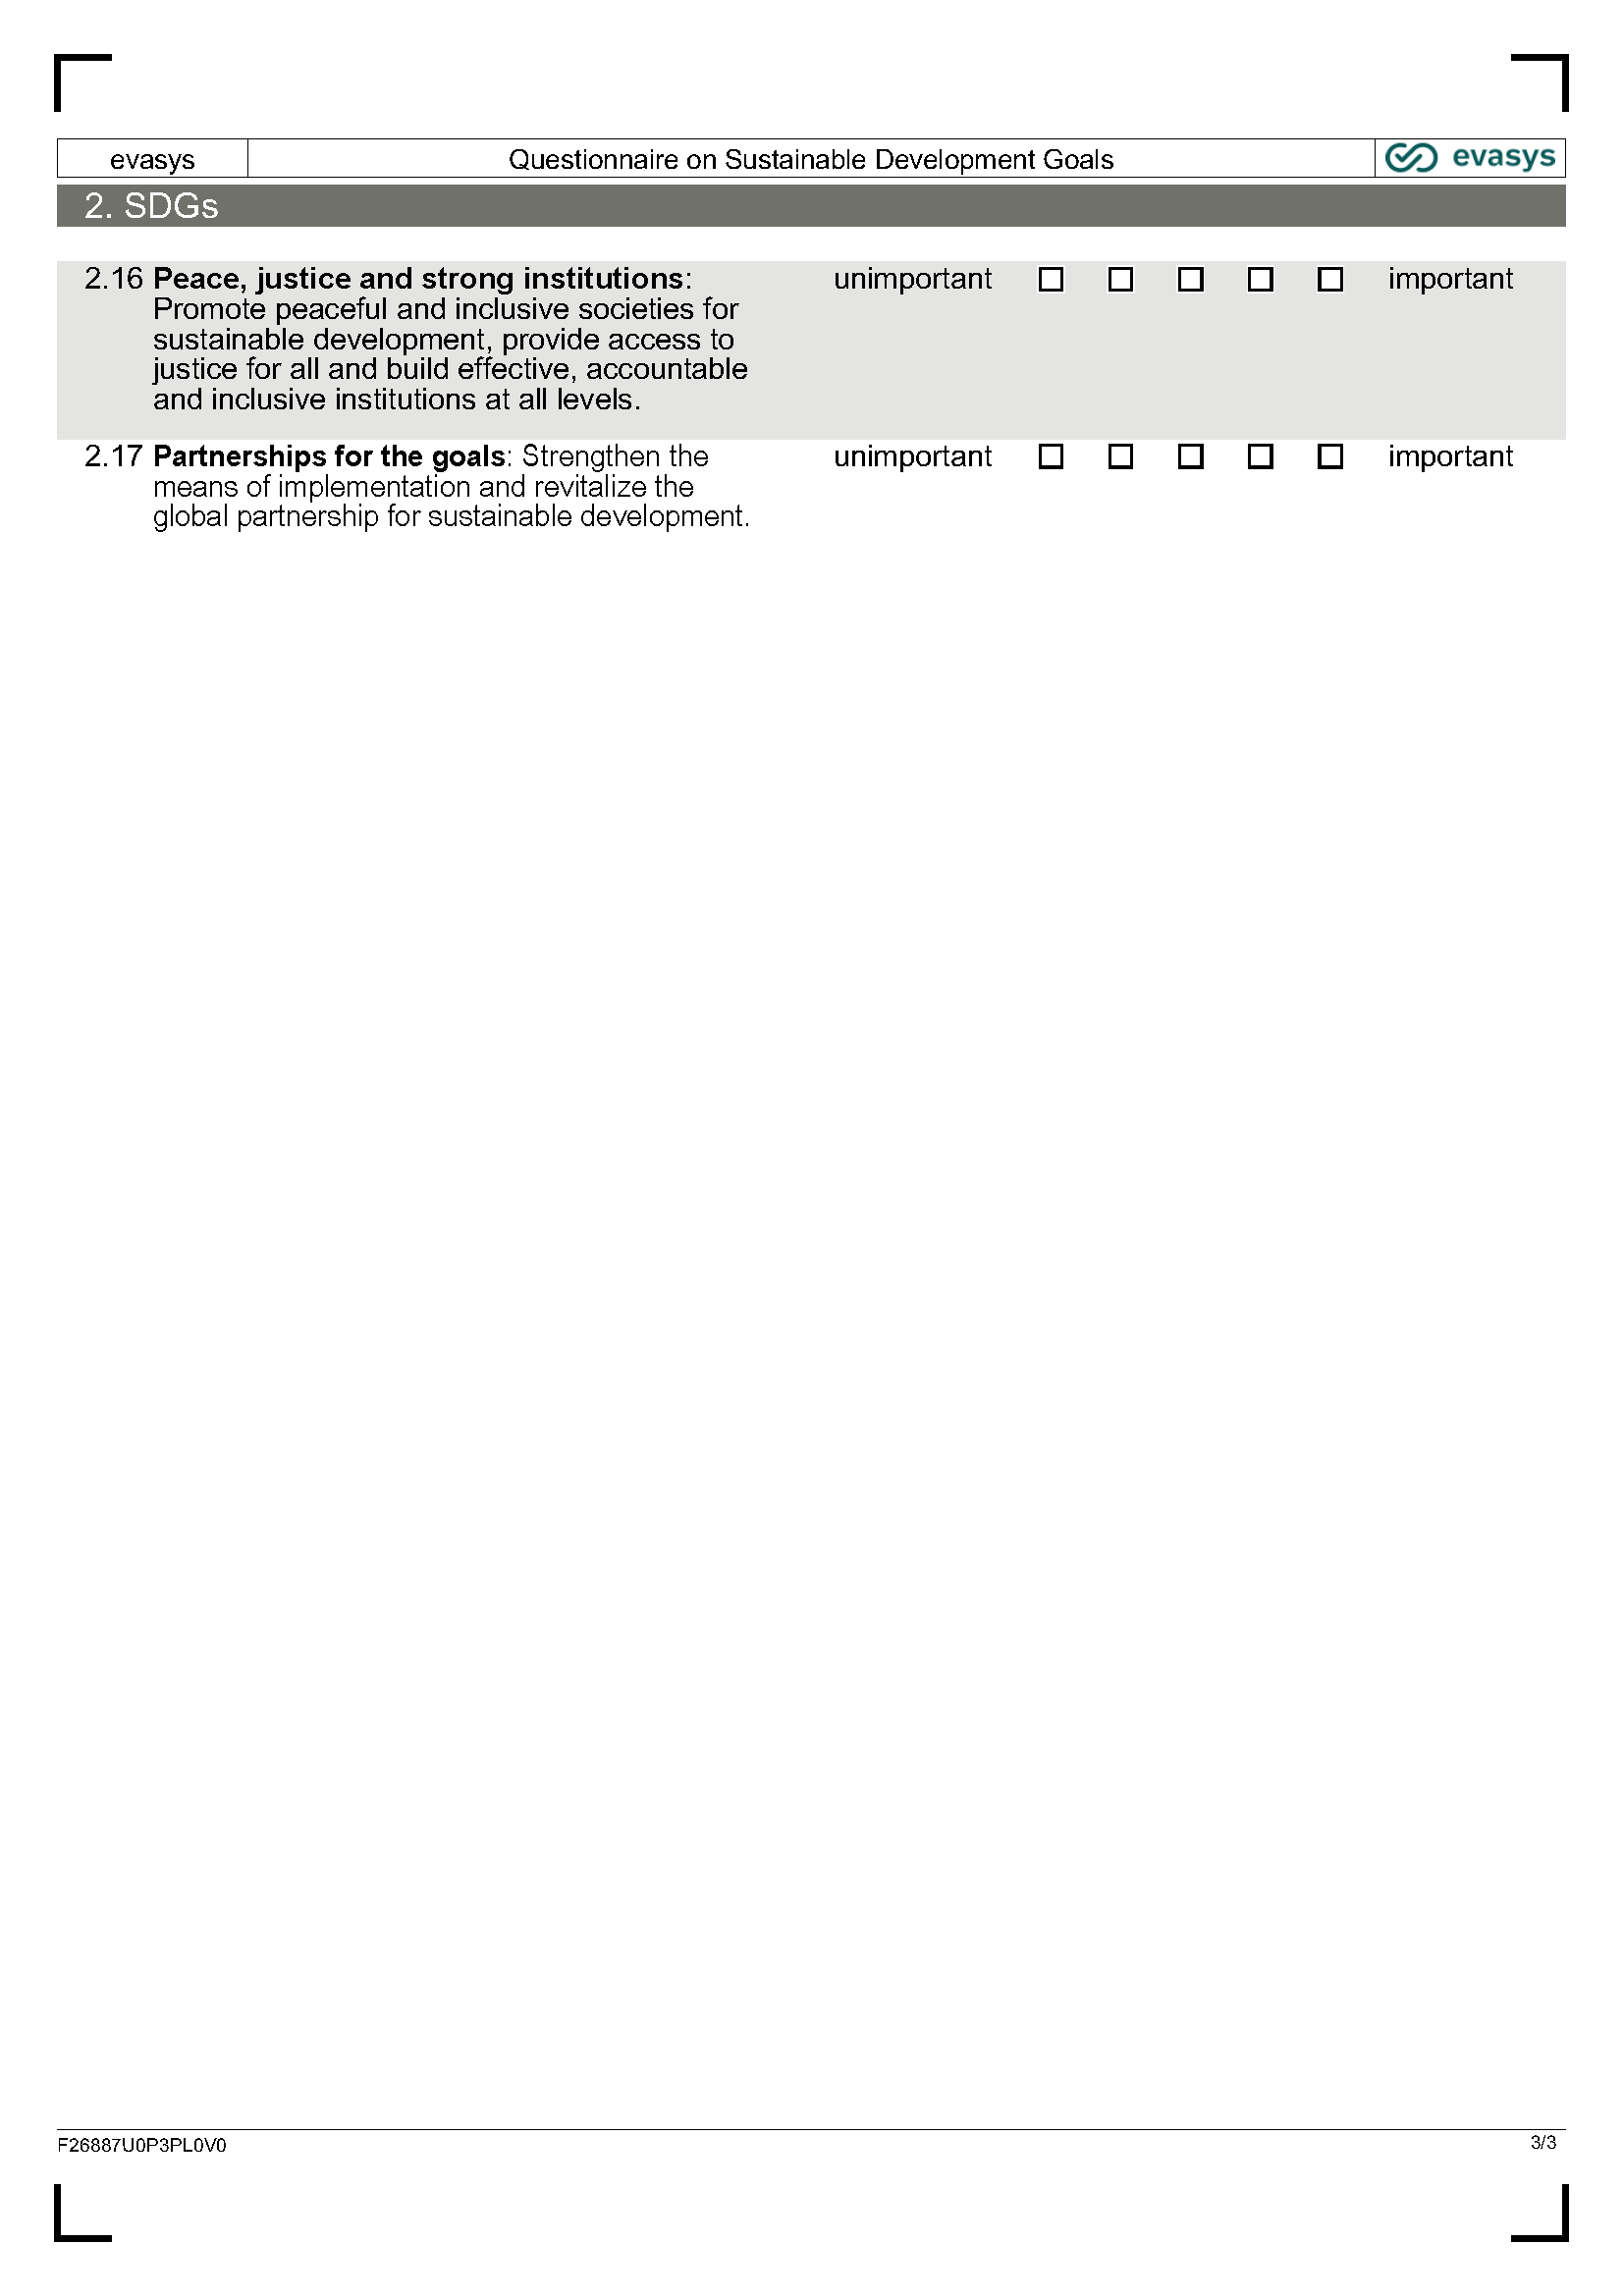

Supplement: MOESM1 [file 41599_2022_1242_MOESM1_ESM.docx]
